# Supplementary material for: Telocytes: Active Players in the Rainbow Trout (Oncorhynchus mykiss) Intestinal Stem-Cell Niche
Source: MDPI journal article supplement (doi:10.3390/ani12010074), 2021-12-30
Supplement: s1 [file s1]

**Table S1.** List of primer sequences used for validating the expression of the genes analyzed by Fluorescence *In Situ* Hybridization whose probes were designed by Advanced Cell Diagnostics (ACD). Gene ID, amplicon size in base pairs (bp), accession number ID, forward and reverse primer sequences are reported for each gene.

| Gene ID<br>(amplicon size in base<br>pairs (bp)) | Accession Number<br>ID | Forward (F) and reverse (R) Primer<br>Sequence (5->3) | Annealing Temperature (°C) | Reference  |
|--------------------------------------------------|------------------------|-------------------------------------------------------|----------------------------|------------|
| <i>sox9</i> (366bp)                              | NM_001124179.1         | F:TGCAGGAGTGCATCTTTGTC<br>R:GGTCAGCCTTCTTGAACTCG      | 60                         | [17]       |
| <i>foxl1</i> (214bp)                             | XM_021569469.2         | F:GAGGAGAGGAACTCACAATCAC<br>R:AGTTTAGCAGAGCCACAGTATC  | 60                         | Own design |
| <i>pdgfra</i> (237bp)                            | XM_021599407.2         | F:TCCGTGACCATGGATGAAATG<br>R: GAAGAGCGTGGCAGTGTAATA   | 60                         | Own design |
